# Supplementary material
Source: PubMed Central journal article supplement (PMC3729432)
Supplement: NIHMS479016-supplement-Supporting_Information.pdf [file NIHMS479016-supplement-Supporting_Information.pdf]

## **Supporting Materials**

|    |                               |       |
|----|-------------------------------|-------|
| 1. | Supplementary Methods         | S2-S4 |
| 2. | Supplementary Figures (S1-S5) | S5-S9 |
| 3. | References                    | S10   |

## Supplementary Methods.

**Preparation of 96-well plate samples for LRET assays:** Details of reagent addition for the preparation of 96-well plates are given for each type of LRET affinity and inhibition assay described in the main text.

### *Analysis of GFP-FKBP/rapamycin/FRB-eDHFR affinity using purified proteins: titration of GFP-FKBP.*

- GFP-FKBP (6  $\mu\text{M}$  in assay buffer) was serially diluted into 24 wells containing 50  $\mu\text{L}$  assay buffer.
- Five rapamycin solutions were prepared (14, 8, 6, 2, 0.8  $\mu\text{M}$  in Assay Buffer), and 25  $\mu\text{L}$  of a given solution was added into wells containing 50  $\mu\text{L}$  GFP-FKBP solutions such that  $[\text{rapamycin}] > [\text{GFP-FKBP}]$ .
- A solution containing FRB-eDHFR (40 nM), TMP-TTHA-cs124( $\text{Tb}^{3+}$ ) (40 nM), and NADPH (4  $\mu\text{M}$ ) was prepared, and 25  $\mu\text{L}$  of it was added into each well.
- The final concentrations of each component in sample wells were as follows:
  - GFP-FKBP, ranging from 3.0  $\mu\text{M}$  to 0.4 pM
  - Rapamycin, ranging from 3.5  $\mu\text{M}$  to 0.2  $\mu\text{M}$
  - FRB-eDHFR, constant in all wells at 10 nM
  - TMP-TTHA-cs124( $\text{Tb}^{3+}$ ), constant in all wells at 10 nM
  - NADPH, constant in all wells at 1  $\mu\text{M}$
- A solution containing TMP-TTHA-cs124( $\text{Tb}^{3+}$ ) (20 nM), and NADPH (2  $\mu\text{M}$ ) was prepared for control wells, and 50  $\mu\text{L}$  of it was added into each control well containing 50  $\mu\text{L}$  GFP-FKBP dilutions.
- The final concentrations of each component in control wells were as follows:
  - GFP-FKBP, ranging from 3.0  $\mu\text{M}$  to 0.4 pM
  - TMP-TTHA-cs124( $\text{Tb}^{3+}$ ), constant in all wells at 10 nM
  - NADPH, constant in all wells at 1  $\mu\text{M}$

### *Analysis of GFP-FKBP/rapamycin/FRB-eDHFR affinity using purified proteins: titration of FRB-eDHFR.*

- FRB-eDHFR (2  $\mu\text{M}$  in assay buffer) was serially diluted into 16 wells containing 50  $\mu\text{L}$  assay buffer.
- A solution containing GFP-FKBP (20 nM), TMP-TTHA-cs124 (2  $\mu\text{M}$ ),  $\text{Tb}^{3+}$  (0.2  $\mu\text{M}$ ), rapamycin (60 nM), and NADPH (4  $\mu\text{M}$ ) was prepared, and 50  $\mu\text{L}$  of it was added into each sample well containing 50  $\mu\text{L}$  FRB-eDHFR dilutions and into each control well containing 50  $\mu\text{L}$  assay buffer.
- The final concentrations of each component in sample wells were as follows:
  - FRB-eDHFR, ranging from 1  $\mu\text{M}$  to 30 pM
  - GFP-FKBP, constant in all wells at 10 nM
  - Rapamycin, constant in all wells at 30 nM

- TMP-TTHA-cs124, constant in all wells at 1  $\mu\text{M}$
- $\text{Tb}^{3+}$ , constant in all wells at 0.1  $\mu\text{M}$
- NADPH, constant in all wells at 2  $\mu\text{M}$
- The final concentrations of each component in control wells were as follows:
  - GFP-FKBP, constant in all wells at 10 nM
  - Rapamycin, constant in all wells at 30 nM
  - TMP-TTHA-cs124, constant in all wells at 1  $\mu\text{M}$
  - $\text{Tb}^{3+}$ , constant in all wells at 0.1  $\mu\text{M}$
  - NADPH, constant in all wells at 2  $\mu\text{M}$

***Analysis of GFP-FKBP/rapamycin/FRB-eDHFR affinity using proteins in cell lysate:***

- Cell lysate (28 mg/ml (w/v)) was serially diluted into 24 wells containing 50  $\mu\text{L}$  assay buffer.
- GFP-FKBP (6  $\mu\text{M}$ ) in cell lysate (28 mg/ml) was serially diluted into 24 wells containing 50  $\mu\text{L}$  cell lysates, in reverse direction of cell lysate dilution.
- Five rapamycin solutions were prepared (14, 8, 6, 2, 0.8  $\mu\text{M}$  in Assay Buffer), and 25  $\mu\text{L}$  of a given solution was added into each sample well such that [rapamycin] > [GFP-FKBP].
- A solution containing FRB-eDHFR (40 nM), TMP-TTHA-cs124( $\text{Tb}^{3+}$ ) (40 nM), and NADPH (4  $\mu\text{M}$ ) was prepared, and 25  $\mu\text{L}$  of it was added into each sample well.
- The final concentrations of each component in sample wells were as follows:
  - GFP-FKBP, ranging from 3.0  $\mu\text{M}$  to 0.4 pM
  - Rapamycin, ranging from 3.5  $\mu\text{M}$  to 0.2  $\mu\text{M}$
  - FRB-eDHFR, constant in all wells at 10 nM
  - TMP-TTHA-cs124( $\text{Tb}^{3+}$ ), constant in all wells at 10 nM
  - NADPH, constant in all wells at 1  $\mu\text{M}$
  - Cell lysate, constant in all wells at 14 mg/ml
- A solution containing TMP-TTHA-cs124( $\text{Tb}^{3+}$ ) (20 nM), and NADPH (2  $\mu\text{M}$ ) was prepared for control wells, and 50  $\mu\text{L}$  of it was added into each control well containing 50  $\mu\text{L}$  GFP-FKBP dilutions in cell lysate.
- The final concentrations of each component in control wells were as follows:
  - GFP-FKBP, ranging from 3.0  $\mu\text{M}$  to 0.4 pM
  - TMP-TTHA-cs124( $\text{Tb}^{3+}$ ), constant in all wells at 10 nM
  - NADPH, constant in all wells at 1  $\mu\text{M}$
  - Cell lysate, constant in all wells at 14 mg/ml

***Analysis of competitive inhibition of GFP-FKBP/rapamycin/FRB-eDHFR interaction using ascomycin.***

- Ascomycin (0.4  $\mu\text{M}$  in assay buffer) was serially diluted into 12 wells containing 50  $\mu\text{L}$  assay buffer.
- A solution containing FRB-eDHFR (60 nM), GFP-FKBP (60 nM), TMP-TTHA-cs124(Tb3+) (60 nM), and NADPH (6  $\mu\text{M}$ ) was prepared, and 25  $\mu\text{L}$  of it was added into each sample well and into each control well containing 75  $\mu\text{L}$  assay buffer.
- 25  $\mu\text{L}$  rapamycin solution (60 nM in assay buffer) was added into each sample well.
- The final concentrations of each component in sample wells were as follows:
  - Ascomycin, ranging from 200 nM to 98 pM
  - GFP-FKBP, constant in all wells at 15 nM
  - FRB-eDHFR, constant in all wells at 15 nM
  - Rapamycin, constant in all wells at 15 nM
  - TMP-TTHA-cs124(Tb3+), constant in all wells at 15 nM
  - NADPH, constant in all wells at 1.5  $\mu\text{M}$
- The final concentrations of each component in control wells were as follows:
  - GFP-FKBP, constant in all wells at 15 nM
  - FRB-eDHFR, constant in all wells at 15 nM
  - Rapamycin, constant in all wells at 15 nM
  - TMP-TTHA-cs124(Tb3+), constant in all wells at 15 nM
  - NADPH, constant in all wells at 1.5  $\mu\text{M}$

## Supplementary Figures.

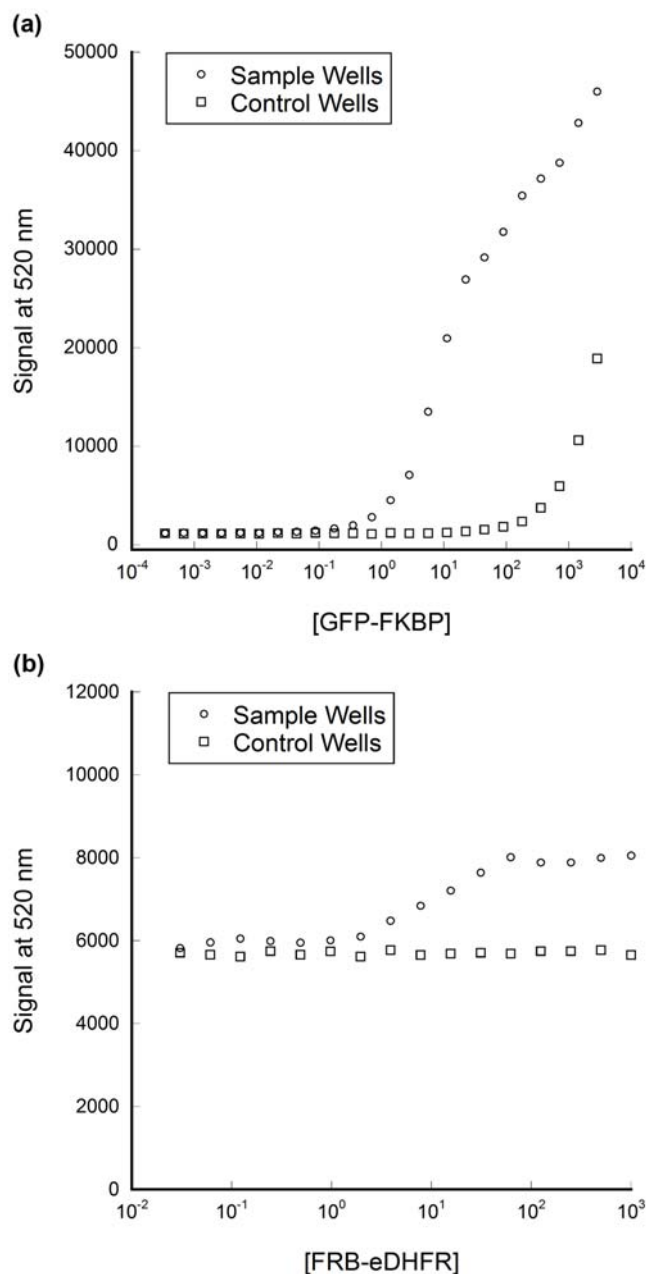

**Figure S1.** Raw LRET signal ( $\lambda_{em} = 520$  nm) observed for representative binding affinity measurements. (a) Signal observed in sample and negative control wells when purified GFP-FKBP was titrated against constant levels of FRB-eDHFR (10 nM) and other assay components. The signal observed in negative controls increases with GFP-FKBP concentration because of non-specific, diffusion-mediated LRET between luminescent terbium complex and GFP. The increased background prevents saturation of the uncorrected LRET sample signal. (b) Signal observed in sample and negative control wells when purified FRB-eDHFR was titrated against constant levels of GFP-FKBP (10 nM) and other assay components. The signal observed in negative controls is persistently high (~5800 counts) across the titration range because there is a high level (100 nM) of luminescent terbium complex present in all wells.

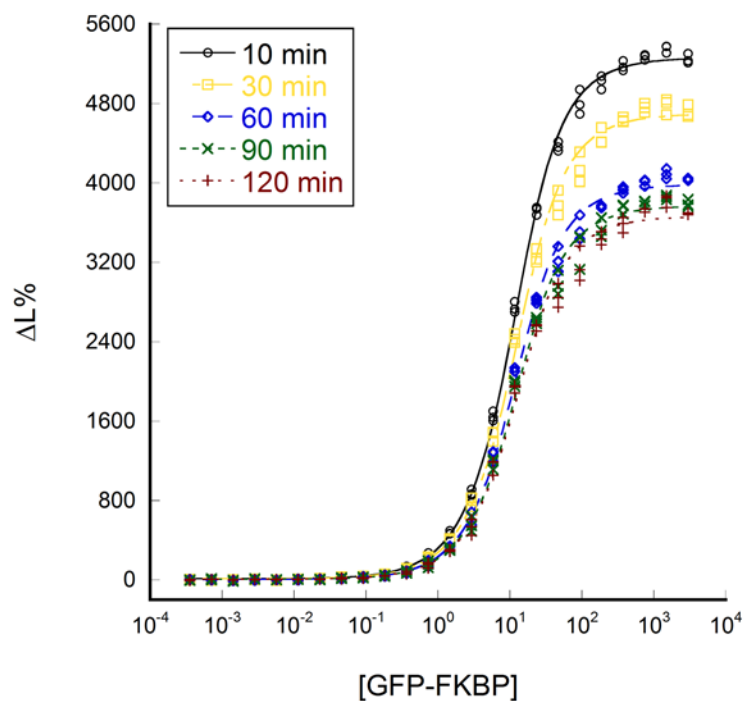

| y = m1-(m1-m2)*((m3+10+m0)-(... |         |         |
|---------------------------------|---------|---------|
|                                 | Value   | Error   |
| m1                              | 12.949  | 9.4125  |
| m2                              | 5261.3  | 15.159  |
| m3                              | 6.6236  | 0.16426 |
| R <sup>2</sup>                  | 0.99933 | NA      |

| y = m1-(m1-m2)*((m3+10+m0)-(... |         |         |
|---------------------------------|---------|---------|
|                                 | Value   | Error   |
| m1                              | 13.605  | 13.443  |
| m2                              | 4696    | 21.846  |
| m3                              | 7.222   | 0.28106 |
| R <sup>2</sup>                  | 0.99828 | NA      |

| y = m1-(m1-m2)*((m3+10+m0)-(... |         |         |
|---------------------------------|---------|---------|
|                                 | Value   | Error   |
| m1                              | 4.7676  | 12.066  |
| m2                              | 3984.3  | 19.494  |
| m3                              | 6.8322  | 0.28436 |
| R <sup>2</sup>                  | 0.99809 | NA      |

| y = m1-(m1-m2)*((m3+10+m0)-(... |         |         |
|---------------------------------|---------|---------|
|                                 | Value   | Error   |
| m1                              | 6.6977  | 13.208  |
| m2                              | 3768    | 21.48   |
| m3                              | 7.2741  | 0.34568 |
| R <sup>2</sup>                  | 0.99742 | NA      |

| y = m1-(m1-m2)*((m3+10+m0)-(... |        |         |
|---------------------------------|--------|---------|
|                                 | Value  | Error   |
| m1                              | 7.0238 | 15.774  |
| m2                              | 3661.6 | 25.736  |
| m3                              | 7.4957 | 0.43498 |
| R <sup>2</sup>                  | 0.9961 | NA      |

**Figure S2.** System reaches equilibrium after ~80 min. when purified GFP-FKBP is titrated against purified FRB-eDHFR to measure dissociation constant, as revealed by representative data plots and associated curve fitting results. The curve fit result were obtained by non-linearly fitting the data to Equation 2 (main text), with m1, m2 and m3 representing  $L_{min}$ ,  $L_{max}$  and  $K_D$ , respectively.

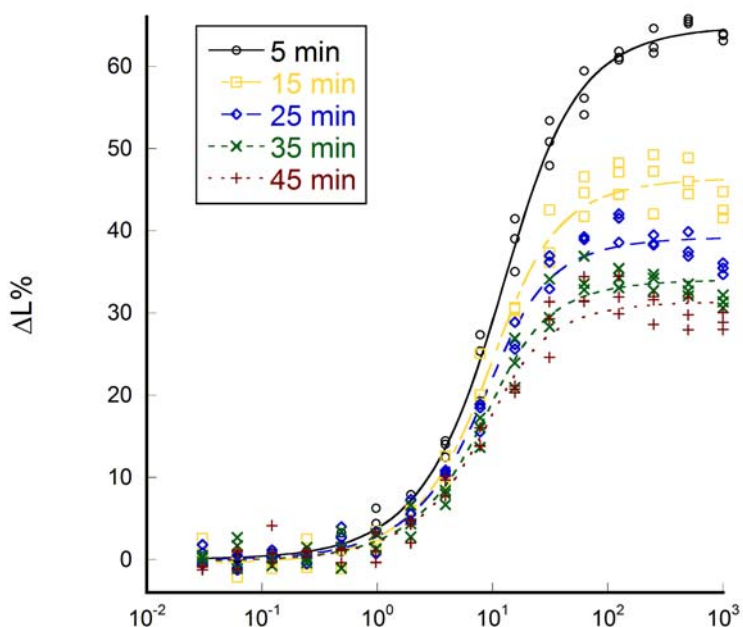

[FRB-eDHFR]

| y = m1-(m1-m2)*((m3+10+m0)-(... |          |         |
|---------------------------------|----------|---------|
|                                 | Value    | Error   |
| m1                              | 0.056611 | 0.38076 |
| m2                              | 64.865   | 0.52594 |
| m3                              | 6.831    | 0.43119 |
| R <sup>2</sup>                  | 0.99631  | NA      |

| y = m1-(m1-m2)*((m3+10+m0)-(... |          |         |
|---------------------------------|----------|---------|
|                                 | Value    | Error   |
| m1                              | -0.49062 | 0.48575 |
| m2                              | 46.396   | 0.63019 |
| m3                              | 4.2178   | 0.5267  |
| R <sup>2</sup>                  | 0.98918  | NA      |

| y = m1-(m1-m2)*((m3+10+m0)-(... |           |         |
|---------------------------------|-----------|---------|
|                                 | Value     | Error   |
| m1                              | -0.015767 | 0.42812 |
| m2                              | 39.224    | 0.54253 |
| m3                              | 3.3667    | 0.47369 |
| R <sup>2</sup>                  | 0.98823   | NA      |

| y = m1-(m1-m2)*((m3+10+m0)-(... |          |         |
|---------------------------------|----------|---------|
|                                 | Value    | Error   |
| m1                              | -0.18774 | 0.41884 |
| m2                              | 34.045   | 0.52988 |
| m3                              | 3.3086   | 0.52497 |
| R <sup>2</sup>                  | 0.98526  | NA      |

| y = m1-(m1-m2)*((m3+10+m0)-(... |          |         |
|---------------------------------|----------|---------|
|                                 | Value    | Error   |
| m1                              | -0.15597 | 0.44914 |
| m2                              | 31.401   | 0.56883 |
| m3                              | 3.3462   | 0.61538 |
| R <sup>2</sup>                  | 0.98014  | NA      |

**Figure S3.** System reaches equilibrium after ~30 min. when purified FRB-eDHFR is titrated against purified GFP-FKBP to measure dissociation constant, as revealed by representative data plots and associated curve fitting results. The curve fit result were obtained by non-linearly fitting the data to Equation 2 (main text), with  $m_1$ ,  $m_2$  and  $m_3$  representing  $L_{min}$ ,  $L_{max}$  and  $K_D$ , respectively.

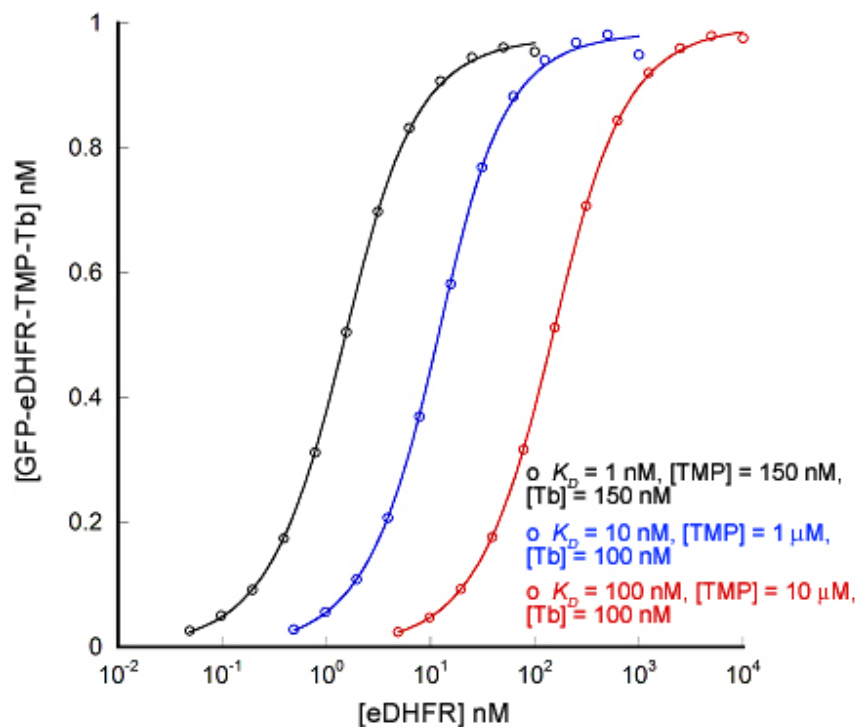

**Figure S4.** A broad range of affinities between eDHFR and GFP fusion proteins can be measured by varying the amount of TMP conjugate and/or the amount of terbium in the assay. The plot shows that the expected equilibrium concentration of a luminescent, GFP-eDHFR-TMP-Tb complex (y-axis) can be made to vary over a similar range under different titration conditions. Calculations were made such that for a given assumed  $K_D$  value,  $[GFP] = K_D$ ,  $0.01K_D < [eDHFR] < 100K_D$ , and [TMP] and [Tb] were as shown in the plot legend.



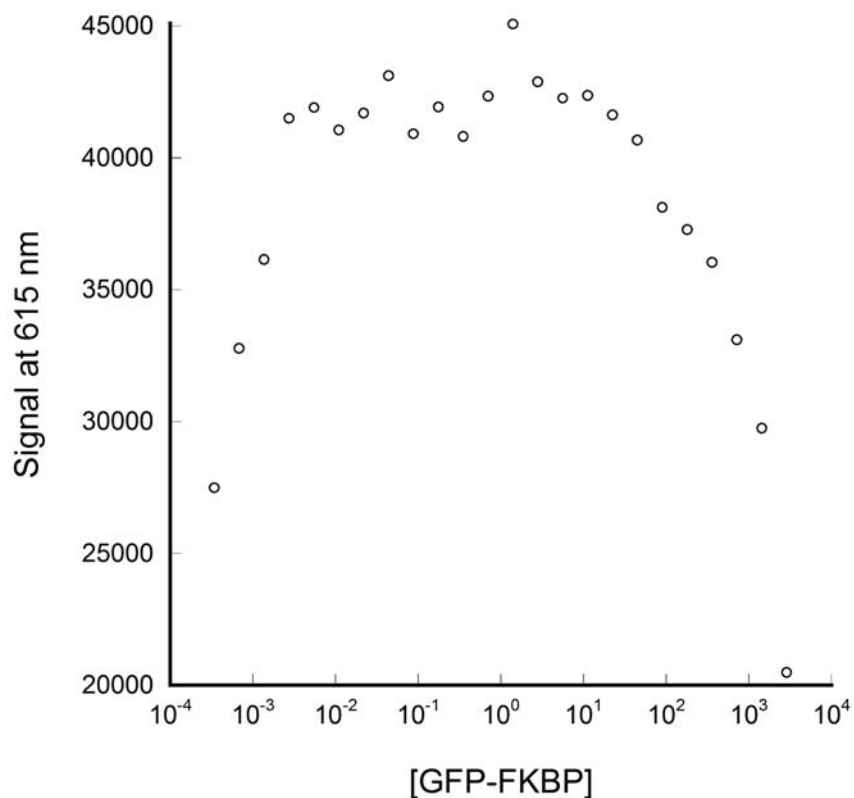

**Figure S5.** Raw  $\text{Tb}^{3+}$  signal ( $\lambda_{\text{em}} = 615 \text{ nm}$ ) observed for a representative data set obtained when bacterial lysates containing GFP-FKBP were titrated against a fixed concentration of FRB-eDHFR. The  $\text{Tb}^{3+}$  luminescence is substantially reduced at the extreme ends of the titration range because these sample wells contain less assay buffer than wells in the mid-range of the titration. The assay buffer is formulated to prevent non-specific binding of TMP-TTHA-cs124( $\text{Tb}^{3+}$ ) to sample wells and resultant sequestration out of the excitation light path. Four data point from either end were omitted for non-linear curve fit calculations (see main text for details).

**References.**

1. Rajapakse, H. E., Reddy, D. R., Mohandessi, S., Butlin, N. G., and Miller, L. W. (2009) Luminescent terbium protein labels for time-resolved microscopy and screening, *Angew Chem Int Ed Engl* 48, 4990-4992.
2. Reddy, D. R., Pedro Rosa, L. E., and Miller, L. W. (2011) Luminescent Trimethoprim-Polyaminocarboxylate Lanthanide Complex Conjugates for Selective Protein Labeling and Time-Resolved Bioassays, *Bioconjug Chem* 22, 1402-1409.
3. Lovrien, R., and Matulis, D. (2005) Assays for total protein, *Curr Protoc Microbiol Appendix 3*, Appendix 3A.
